# Supplementary material
Source: publisher site journal article supplement (https://www.dovepress.com/get_supplementary_file.php?f=466904.docx)
Supplement: Supplementary file 1 [file get_supplementary_file.php]

Supplementary Material

# Supplemental material and methods

**Baseline examination**

Anthropometric measurements were taken by trained nurses. Data for height and weight were 3 acquired following a protocol standardized to an accuracy of 0.1 kg and 0.1 cm, respectively. Current smokers were defined as having smoked 100 cigarettes in their lifetime and currently smoking. Blood pressure was measured using a mercury sphygmomanometer after the patient had rested quietly for at least 10 minutes, and the average of multiple measurements was taken as the systolic and diastolic blood pressure values. All biochemical tests were measured by blood sampling after an overnight fast.

**Definitions**

Criteria for hypertension included self-reported hypertension, current use of anti-hypertensive medication, or systolic blood pressure (SBP) ≥ 140 mmHg and/or diastolic blood pressure (DBP) ≥ 90 mmHg recorded for at least three consecutive readings. diabetes was defined as fasting serum glucose ≥7.0 mmol/L, the 2-h serum glucose of the oral glucose tolerance test ≥11.1 mmol/L, or the current use of hypoglycaemic medication or insulin. coronary heart disease (CHD) was defined as a fatal or nonfatal myocardial infarction, unstable angina, and coronary revascularization. To identify primary aldosteronism (PA) according to the Endocrine Society's Clinical Practice Guidelines, patients were diagnosed with PA based on a PAC level of ≥ 12 ng/dL, an aldosterone-to-renin ratio ≥ 20, and a PAC value ≥ 10 ng/dL confirmed by saline infusion testing (1). Menopausal status was defined according to World Health Organization recommendations, which regard amenorrhea lasting 12 months as indicative of the menopause (2). The body mass index (BMI) was calculated as per the formula: Weight (kg)/Height2 (m).

**Bone Mineral Density Assessment**

Dual-energy X-ray absorptiometry (DXA) scans were performed by two health technologists who were certified radiology technologists using the bone densitometer (Horizon Wi S/N302999M, Hologic, MA, USA) (3). The DXA machine was calibrated daily with a phantom. Lumbar spine (L1–L4) and femoral regions (total femur; femur neck; Ward's triangle) scans of each subject were performed and analyzed upon test completion, with each scan taking approximately 5 min (4). The short-term in vivo coefficient of variation for the DXA machine was 1.8% for the lumbar spine and 1.2% for the femoral regions. The lumbar and femoral regions BMD were computed automatically by the DXA scanner.

**Details of the statistical analyses**.

Variables of baseline characteristics are shown as n (%) if categorical, mean (SD) if normally distributed, and median (interquartile range) if nonnormally distributed. In order to compare features between the two groups, Chi-square test was used for categorical variables, and independent sample T-test or Mann-Whitney U test was used for continuous variables with normal and skew distributions.

Prior to any regression analysis, we tested multicollinearity among the predictors by checking for the variance inflation factor. Multicollinearity analyses revealed that variance inflation factors were smaller than 10 for all predictor variables, confirming that regression models were not affected by the presence of multicollinearity. Multivariable linear regression models were used to estimate the associations between cumulative drug doses and BMD and FRAX score, respectively. The relationship between spironolactone use and reduced bone mass and osteoporosis was examined by multivariate logistic regression model. This study set four different models (Model 1: unadjusted; Model 2: adjusted for age, sex, BMI, and smoking status; Model 3: Model 2 plus adjustment for serum potassium, PTH, serum calcium, serum phosphorus, and ALP. Model 4: Model 3 plus adjustment the use probability of spironolactone. In addition, the restricted inverse square spline (four nodes at the 5th, 35th, 65th, and 95th percentiles of the cumulative drug doses distribution) was used to evaluate the dose-response relationship between cumulative drug dose and the risks of decreased bone mass and osteoporosis, and the turning points were further calculated using a recursive algorithm. Moreover, based on the turning point, we conducted a two-stage comparisons before and after the turning point. In addition, subgroup analyses were conducted by gender, age, body mass index, smoking status, menopause, diabetes, and use of various medication types, and multiplicative interaction tests were applied. Finally, in order to demonstrate the robustness of the results, we also excluded PA for sensitivity analysis.

All analyses were done using R (4.2.2). All P-values were two-sided, and P-values of <0.05 denoted statistical significance.

**2 Supplementary Tables**

**Table S1**. List of medications included in the study

| Drug class | Drug name |
| --- | --- |
| Aspirin | Aspirin |
| Statin | Atorvastatin, fluvastatin, pitavastatin, rosuvastatin, simvastatin |
| Diuretics | Acetazolamide, amiloride, benzyl hydrochlorothiazide, bumetanide, furosemide, hydrochlorothiazide, indapamide, spironolactone |
| Beta-blocker | Atenolol, bisoprolol, carvedilol, metoprolol, propranolol |
| Calcium channel blockers | Amlodipine, diltiazem, felodipine, lercanidipine, nifedipine,  verapamil |
| Angiotensin-converting enzyme inhibitors or angiotensin receptor blockers | Azilsartan, candestartan, captopril, enalapril, fosinopril, irbesartan, losartan, olmesartan, ramipril telmisartan, valsartan |
| Oral antidiabetic agents | Metformin, glipizide, gliclazide, glimepiride, glyburide, alogliptin, linagliptin, sitagliptin, vidagliptin, saxagliptin, acarbose, nateglinide, meglitinide, repaglinde, pioglitzone,dulaglutide, exenatide, liraglutide |
| Insulin | Rapid, short, intermediate, and long-acting insulins |

**Table S2**. Covariance diagnostics

| Variables | VIF |
| --- | --- |
| Sex | 7.54727 |
| Age | 1.962591 |
| BMI | 1.21627 |
| SBP | 1.773716 |
| DBP | 2.265394 |
| Current smoking | 1.589819 |
| Menopausal | 6.629202 |
| Serum potassium | 1.14567 |
| PTH | 1.168955 |
| Serum calcium | 1.037433 |
| 25-hydroxyvitamin D | 1.093601 |
| Serum phosphorus | 1.145853 |
| ALT | 3.849798 |
| AST | 3.448509 |
| Cr | 1.575069 |
| ALP | 1.181397 |
| TSH | 1.133995 |
| Urea | 1.525883 |
| PA | 1.083807 |
| DM | 4.341657 |
| CHD | 1.133207 |
| Statins | 1.18932 |
| Diuretics | 1.20997 |
| Beta-blockers | 1.260242 |
| Calcium channel blockers | 1.146465 |
| ACEIs/ARBs | 1.299392 |
| Antihyperglycemic drug | 4.226728 |

VIF = 1/(1-R2). VIF step-by-step screening method: Calculate the VIF of each variable. If the maximum VIF value is ≥ 10, remove the variable with the maximum VIF value.

Abbreviations: VIF, variance inflation factors; BMI, body mass index; SBP, systolic blood pressure; DBP, diastolic blood pressure; PTH, parathyroid hormone; ALT, alanine transaminase; AST, aspartate transaminase; Cr, creatinine; ALP, alkaline phosphatase; TSH, thyroid stimulating hormone; PA, primary aldosteronism; DM, diabetes mellitus; CHD, coronary heart disease; ACEIs, angiotensin-converting enzyme inhibitors; ARBs, angiotensin receptor blockers.

**Table S3.** Effect of user versus non-user on decreased bone mass before matching

| Exposure | Model 1 | Model 2 | Model 3 | Model 4 |
| --- | --- | --- | --- | --- |
|  | OR (95%CI) | OR (95%CI) | OR (95%CI) | OR (95%CI) |
| Non-user | Reference | Reference | Reference | Reference |
| User | 0.479 (0.339, 0.678) | 0.457 (0.321, 0.654) | 0.412 (0.255, 0.597) | 0.439 (0.332, 0.580) |

Model 1: no covariates were adjusted.

Model 2: age, sex, BMI, and smoking status were adjusted.

Model 3: Model 2 plus adjustment for serum potassium, PTH, serum calcium, serum phosphorus, and ALP.

Model 4: Model 3 plus adjustment for the the use probability of spironolactone.

Abbreviations: OR, odds ratio; CI, confidence interval; BMI, body mass index; PTH, parathyroid hormone; ALP, alkaline phosphatase.

**Table S4.** Effect of user versus non-user on decreased bone mass after matching

| Exposure | Model 1 | Model 2 | Model 3 | Model 4 |
| --- | --- | --- | --- | --- |
|  | OR (95%CI) | OR (95%CI) | OR (95%CI) | OR (95%CI) |
| Non-user | Reference | Reference | Reference | Reference |
| User | 0.452 (0.345, 0.593) | 0.434 (0.328, 0.574) | 0.386 (0.286, 0.520) | 0.371 (0.273, 0.503) |

Model 1: no covariates were adjusted.

Model 2: age, sex, BMI, and smoking status were adjusted.

Model 3: Model 2 plus adjustment for serum potassium, PTH, serum calcium, serum phosphorus, and ALP.

Model 4: Model 3 plus adjustment for the use probability of spironolactone.

Abbreviations: OR, odds ratio; CI, confidence interval; BMI, body mass index; PTH, parathyroid hormone; ALP, alkaline phosphatase.

**Table S5.** The relationship between cumulative drug dose and BMD in various body regions.

| Exposure | Model 1 | Model 2 | Model 3 | Model 4 |
| --- | --- | --- | --- | --- |
| β (95% CI) | β (95% CI) | β (95% CI) | β (95% CI) |
| **Lumbar 1** |  |  |  |  |
| Cumulative dose (per 100 mg.months increase) | 0.077 (0.053, 0.101) | 0.068 (0.044, 0.092) | 0.037 (0.014, 0.059) | 0.040 (0.017, 0.063) |
| **Lumbar 2** |  |  |  |  |
| Cumulative dose (per 100 mg.months increase) | 0.083 (0.060, 0.104) | 0.073 (0.051, 0.095) | 0.050 (0.029, 0.071) | 0.050 (0.028, 0.071) |
| **Lumbar 3** |  |  |  |  |
| Cumulative dose (per 100 mg.months increase) | 0.082 (0.060, 0.105) | 0.075 (0.053, 0.097) | 0.051 (0.029, 0.072) | 0.052 (0.030, 0.074) |
| **Lumbar 4** |  |  |  |  |
| Cumulative dose (per 100 mg.months increase) | 0.081 (0.057, 0.104) | 0.073 (0.049, 0.096) | 0.041 (0.019, 0.063) | 0.042 (0.020, 0.064) |
| **Neck** |  |  |  |  |
| Cumulative dose (per 100 mg.months increase) | 0.034 (0.021, 0.046) | 0.034 (0.023, 0.046) | 0.020 (0.008, 0.031) | 0.017 (0.005, 0.028) |
| **Wards** |  |  |  |  |
| Cumulative dose (per 100 mg.months increase) | 0.064 (0.050, 0.078) | 0.066 (0.053, 0.079) | 0.053 (0.039, 0.066) | 0.049 (0.036, 0.063) |
| **Total** |  |  |  |  |
| Cumulative dose (per 100 mg.months increase) | 0.053 (0.041, 0.066) | 0.049 (0.037, 0.061) | 0.037 (0.025, 0.049) | 0.036 (0.024, 0.048) |

Model 1: no covariates were adjusted.

Model 2: age, sex, BMI, and smoking status were adjusted.

Model 3: Model 2 plus adjustment for serum potassium, PTH, serum calcium, serum phosphorus, and ALP.

Model 4: Model 3 plus adjustment for the the use probability of spironolactone.

Abbreviations: BMD, bone mineral density; Neck, neck of the femur; Wards, Ward's triangle; Total, total femur; β, regression coefficient; CI, confidence interval; BMI, body mass index; PTH, parathyroid hormone; ALP, alkaline phosphatase.

**Table S6.** Bone mass characteristics stratified according to the turning point of RCS decreased bone mass.

| Characteristic | **< 370 mg.months** | **>= 370 mg.months** | P value |
| --- | --- | --- | --- |
| N | 120 | 140 |  |
| Lumbar 1 | -0.52±1.42 | 0.36±1.93 | <0.001 |
| Lumbar 2 | -0.44±1.35 | 0.41±1.78 | <0.001 |
| Lumbar 3 | -0.34±1.41 | 0.47±1.79 | <0.001 |
| Lumbar 4 | -0.28±1.50 | 0.48±1.89 | <0.001 |
| Neck | -0.69±0.81 | -0.46±1.00 | 0.001 |
| Wards | -1.12±0.86 | -0.78±1.18 | <0.001 |
| Total | -0.14±0.83 | 0.22±1.01 | <0.001 |
| MOF | 3.42±2.16 | 2.69±1.26 | <0.001 |
| HF | 1.23±1.77 | 0.75±0.81 | <0.001 |
| Decreased bone mass | 78 (65.00%) | 66 (47.14%) | <0.001 |

Data are presented as mean ± standard deviation, or as numbers, and percentages.

Abbreviations: RCS, restricted cubic splines; Neck, neck of the femur; Wards, Ward's triangle; Total, total femur; MOF, major osteoporotic fracture; HF, hip fracture.

**Table S7.** The impact of cumulative dose before and after the RCS turning point on decreased bone mass

| **Decreased bone mass** | OR (95% CI) | P value |
| --- | --- | --- |
| Turning point (mg.months) | 370 |  |
| Cumulative dose < 370 mg.months | Reference |  |
| Cumulative dose > = 370 mg.months | 0.597 (0.418, 0.851) | 0.004 |

Age, sex, BMI, smoking status, serum potassium, PTH, serum calcium, serum phosphorus, ALP, and the use probability of spironolactone were adjusted.

Abbreviations: RCS, restricted cubic splines; OR, odds ratio; CI, confidence interval; BMI, body mass index; PTH, parathyroid hormone; ALP, alkaline phosphatase.

**Table S8.** Bone mass characteristics stratified according to the turning point of RCS osteoporosis

| Characteristic | **< 400 mg.months** | **>= 400 mg.months** | P value |
| --- | --- | --- | --- |
| N | 130 | 130 |  |
| Lumbar 1 | -0.57±1.42 | 0.47±1.92 | <0.001 |
| Lumbar 2 | -0.48±1.36 | 0.51±1.76 | <0.001 |
| Lumbar 3 | -0.38±1.40 | 0.57±1.78 | <0.001 |
| Lumbar 4 | -0.31±1.51 | 0.56±1.89 | <0.001 |
| Neck | -0.73±0.81 | -0.41±0.99 | <0.001 |
| Wards | -1.18±0.89 | -0.70±1.16 | <0.001 |
| Total | -0.17±0.83 | 0.26±1.01 | <0.001 |
| MOF | 3.45±2.09 | 2.61±1.26 | <0.001 |
| HF | 1.22±1.71 | 0.72±0.82 | <0.001 |
| Osteoporosis | 24(18.46%) | 9(6.92%) | <0.001 |

Data are presented as mean ± standard deviation, or as numbers, and percentages.

Abbreviations: RCS, restricted cubic splines; Neck, neck of the femur; Wards, Ward's triangle; Total, total femur; MOF, major osteoporotic fracture; HF, hip fracture.

**Table S9.** Sensitivity analysis of the effect of user versus non-user on decreased bone mass before matching after excluding patients with PA.

| Exposure | Model 1 | Model 2 | Model 3 | Model 4 |
| --- | --- | --- | --- | --- |
|  | OR (95%CI) | OR (95%CI) | OR (95%CI) | OR (95%CI) |
| Non-user | Reference | Reference | Reference | Reference |
| User | 0.523 (0.371, 0.738) | 0.501 (0.351, 0.715) | 0.449 (0.311, 0.648) | 0.456 (0.314, 0.661) |

Model 1: no covariates were adjusted.

Model 2: age, sex, BMI, and smoking status were adjusted.

Model 3: Model 2 plus adjustment for serum potassium, PTH, serum calcium, serum phosphorus, and ALP.

Model 4: Model 3 plus adjustment for the the use probability of spironolactone.

Abbreviations: PA, primary aldosteronism; OR, odds ratio; CI, confidence interval; BMI, body mass index; PTH, parathyroid hormone; ALP, alkaline phosphatase.

**Table S10.** Sensitivity analysis of the effect of user versus non-user on osteoporosis before matching after excluding patients with PA.

| Exposure | Model 1 | Model 2 | Model 3 | Model 4 |
| --- | --- | --- | --- | --- |
|  | OR (95%CI) | OR (95%CI) | OR (95%CI) | OR (95%CI) |
| Non-user | Reference | Reference | Reference | Reference |
| User | 0.488 (0.307, 0.776) | 0.477 (0.297, 0.767) | 0.450 (0.278, 0.728) | 0.451 (0.278, 0.731) |

Model 1: no covariates were adjusted.

Model 2: age, sex, BMI, and smoking status were adjusted.

Model 3: Model 2 plus adjustment for serum potassium, PTH, serum calcium, serum phosphorus, and ALP.

Model 4: Model 3 plus adjustment for the the use probability of spironolactone.

Abbreviations: PA, primary aldosteronism; OR, odds ratio; CI, confidence interval; BMI, body mass index; PTH, parathyroid hormone; ALP, alkaline phosphatase.

**Table S11.** Sensitivity analysis of the effect of user versus non-user on decreased bone mass after matching after excluding patients with PA.

| Exposure | Model 1 | Model 2 | Model 3 | Model 4 |
| --- | --- | --- | --- | --- |
|  | OR (95%CI) | OR (95%CI) | OR (95%CI) | OR (95%CI) |
| Non-user | Reference | Reference | Reference | Reference |
| User | 0.549 (0.383, 0.787) | 0.517 (0.356, 0.752) | 0.448 (0.302, 0.664) | 0.399 (0.266, 0.597) |

Model 1: no covariates were adjusted.

Model 2: age, sex, BMI, and smoking status were adjusted.

Model 3: Model 2 plus adjustment for serum potassium, PTH, serum calcium, serum phosphorus, and ALP.

Model 4: Model 3 plus adjustment for the the use probability of spironolactone.

Abbreviations: PA, primary aldosteronism; OR, odds ratio; CI, confidence interval; BMI, body mass index; PTH, parathyroid hormone; ALP, alkaline phosphatase.

**Table S12.** Sensitivity analysis of the effect of user versus non-user on osteoporosis after matching after excluding patients with PA.

| Exposure | Model 1 | Model 2 | Model 3 | Model 4 |
| --- | --- | --- | --- | --- |
|  | OR (95%CI) | OR (95%CI) | OR (95%CI) | OR (95%CI) |
| Non-user | Reference | Reference | Reference | Reference |
| User | 0.500 (0.311, 0.804) | 0.519 (0.320, 0.841) | 0.469 (0.285, 0.773) | 0.450 (0.272, 0.743) |

Model 1: no covariates were adjusted.

Model 2: age, sex, BMI, and smoking status were adjusted.

Model 3: Model 2 plus adjustment for serum potassium, PTH, serum calcium, serum phosphorus, and ALP.

Model 4: Model 3 plus adjustment for the the use probability of spironolactone.

Abbreviations: PA, primary aldosteronism; OR, odds ratio; CI, confidence interval; BMI, body mass index; PTH, parathyroid hormone; ALP, alkaline phosphatase.

**3 Supplementary Figures**

**Figure S1** Match the variance inflation factor plots of each variable in the data.

**
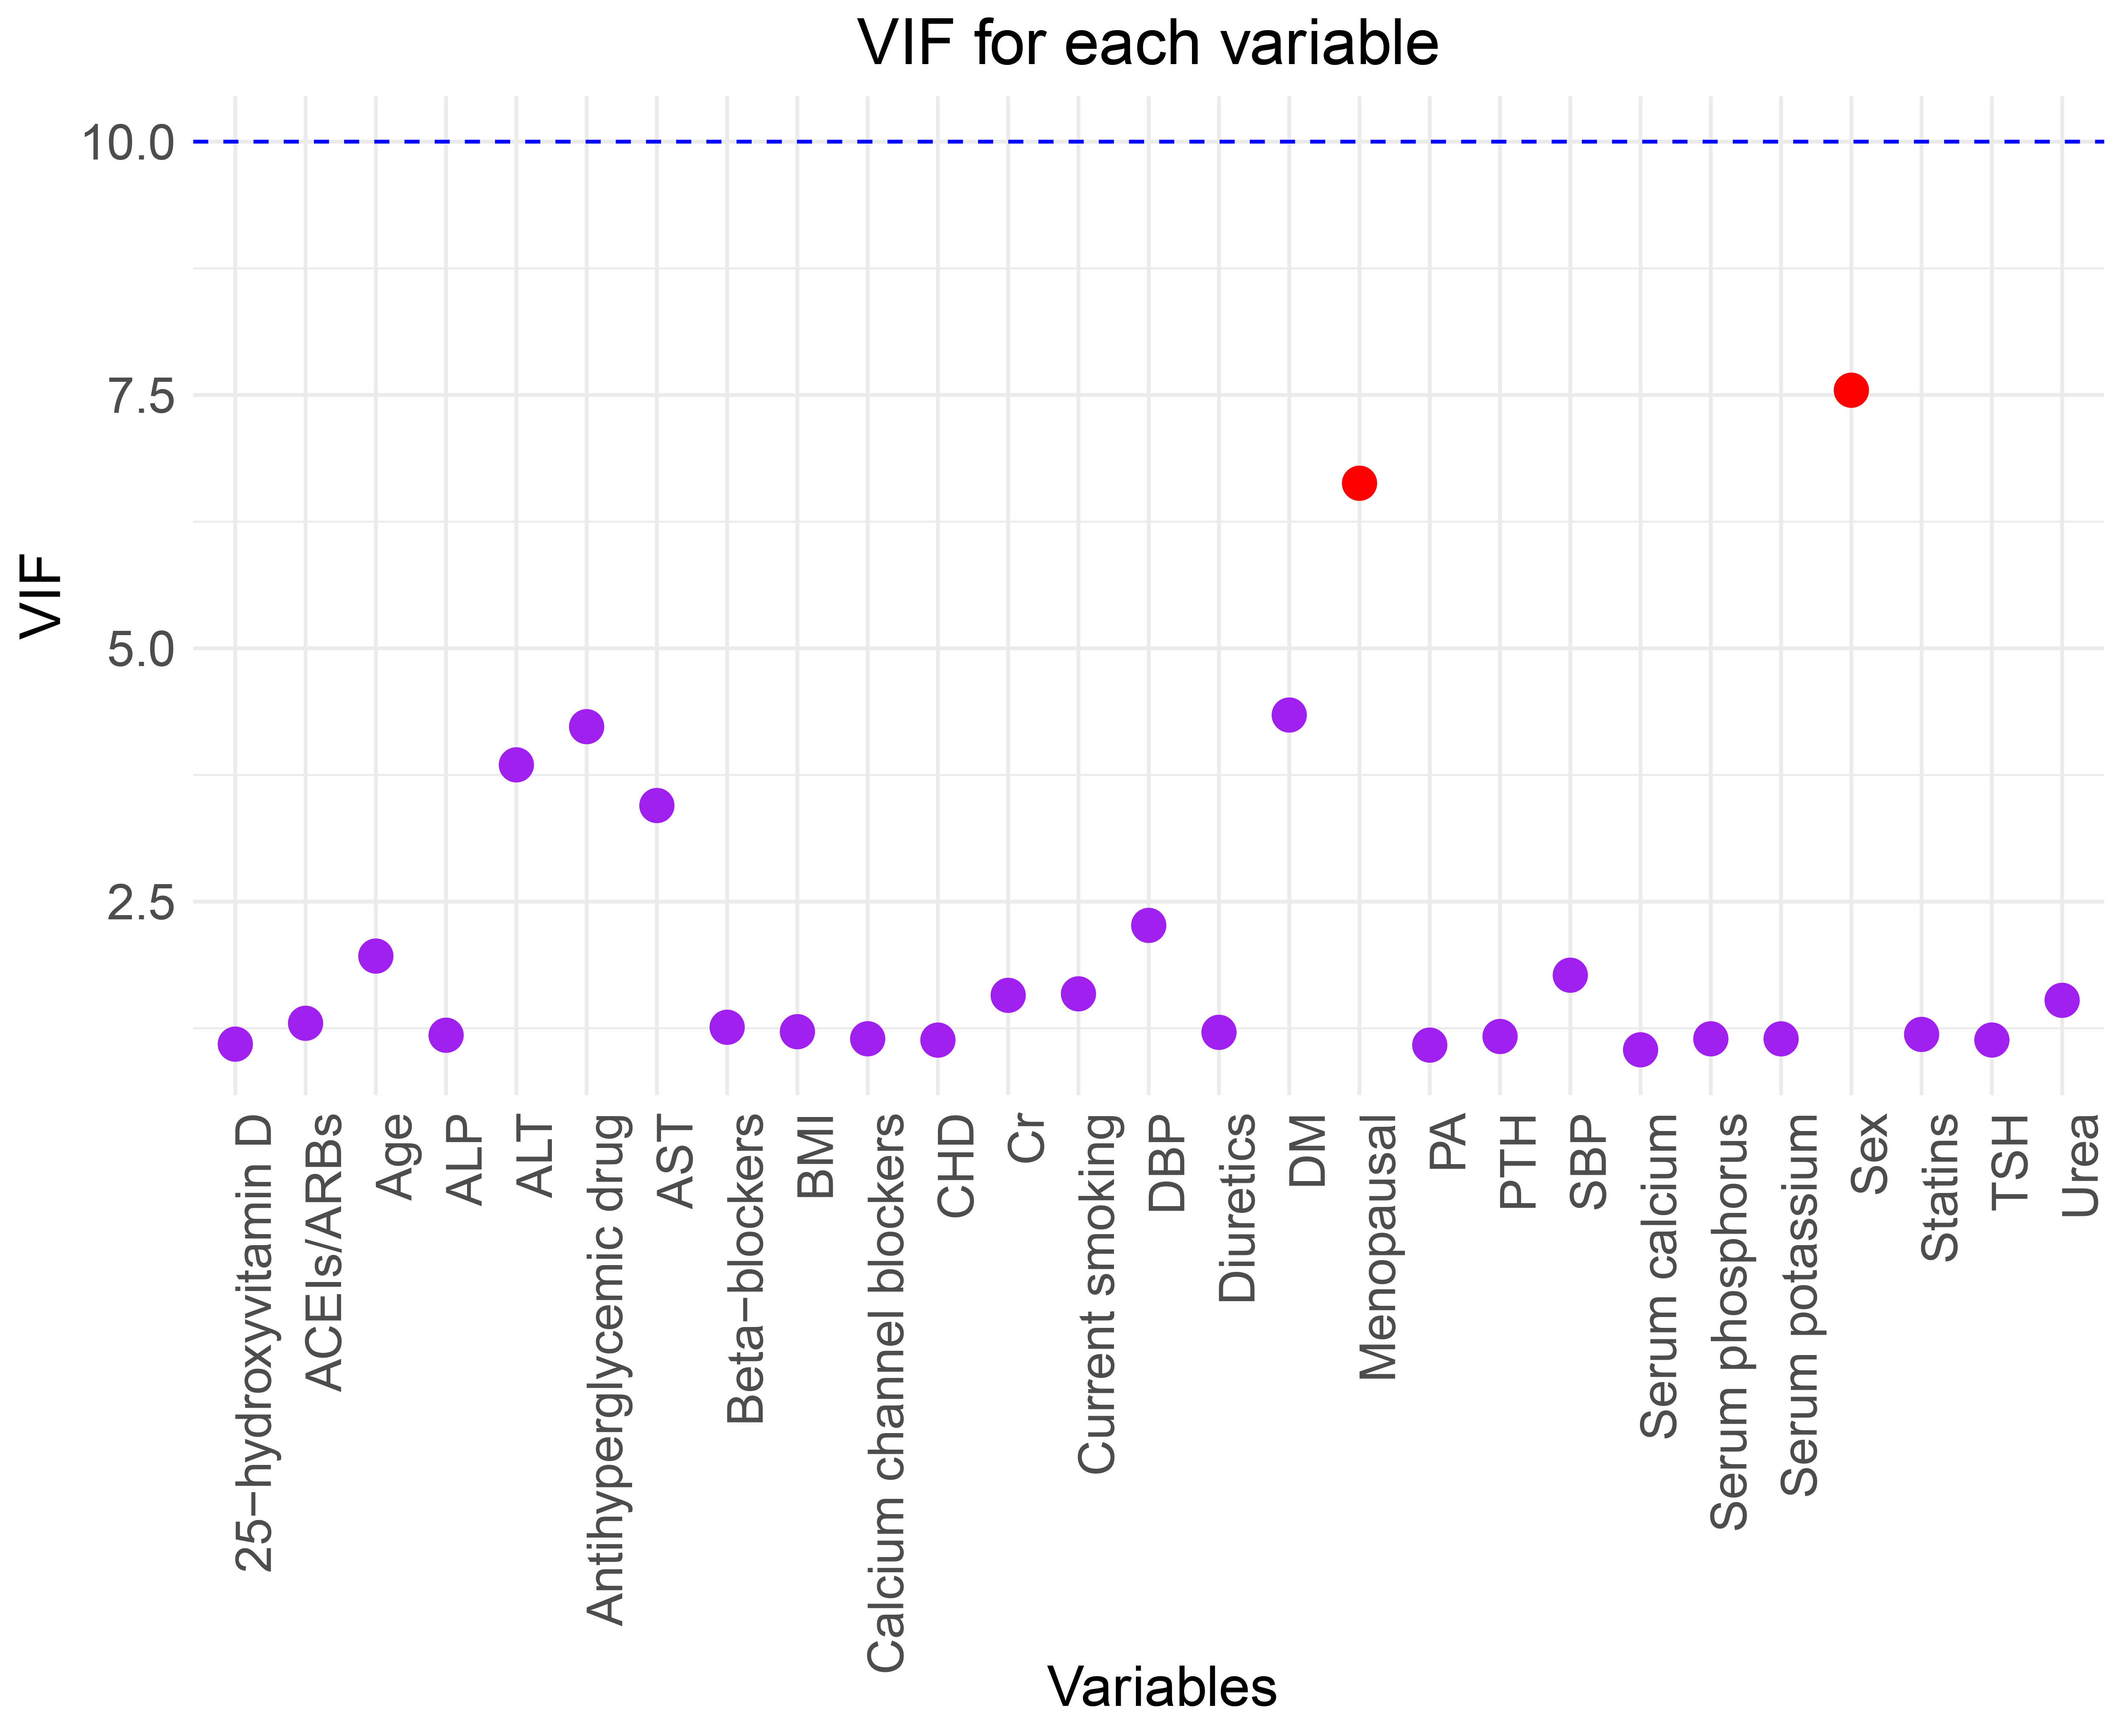
**

**Figure S2** Standardised mean differences in before and after propensity score matching.


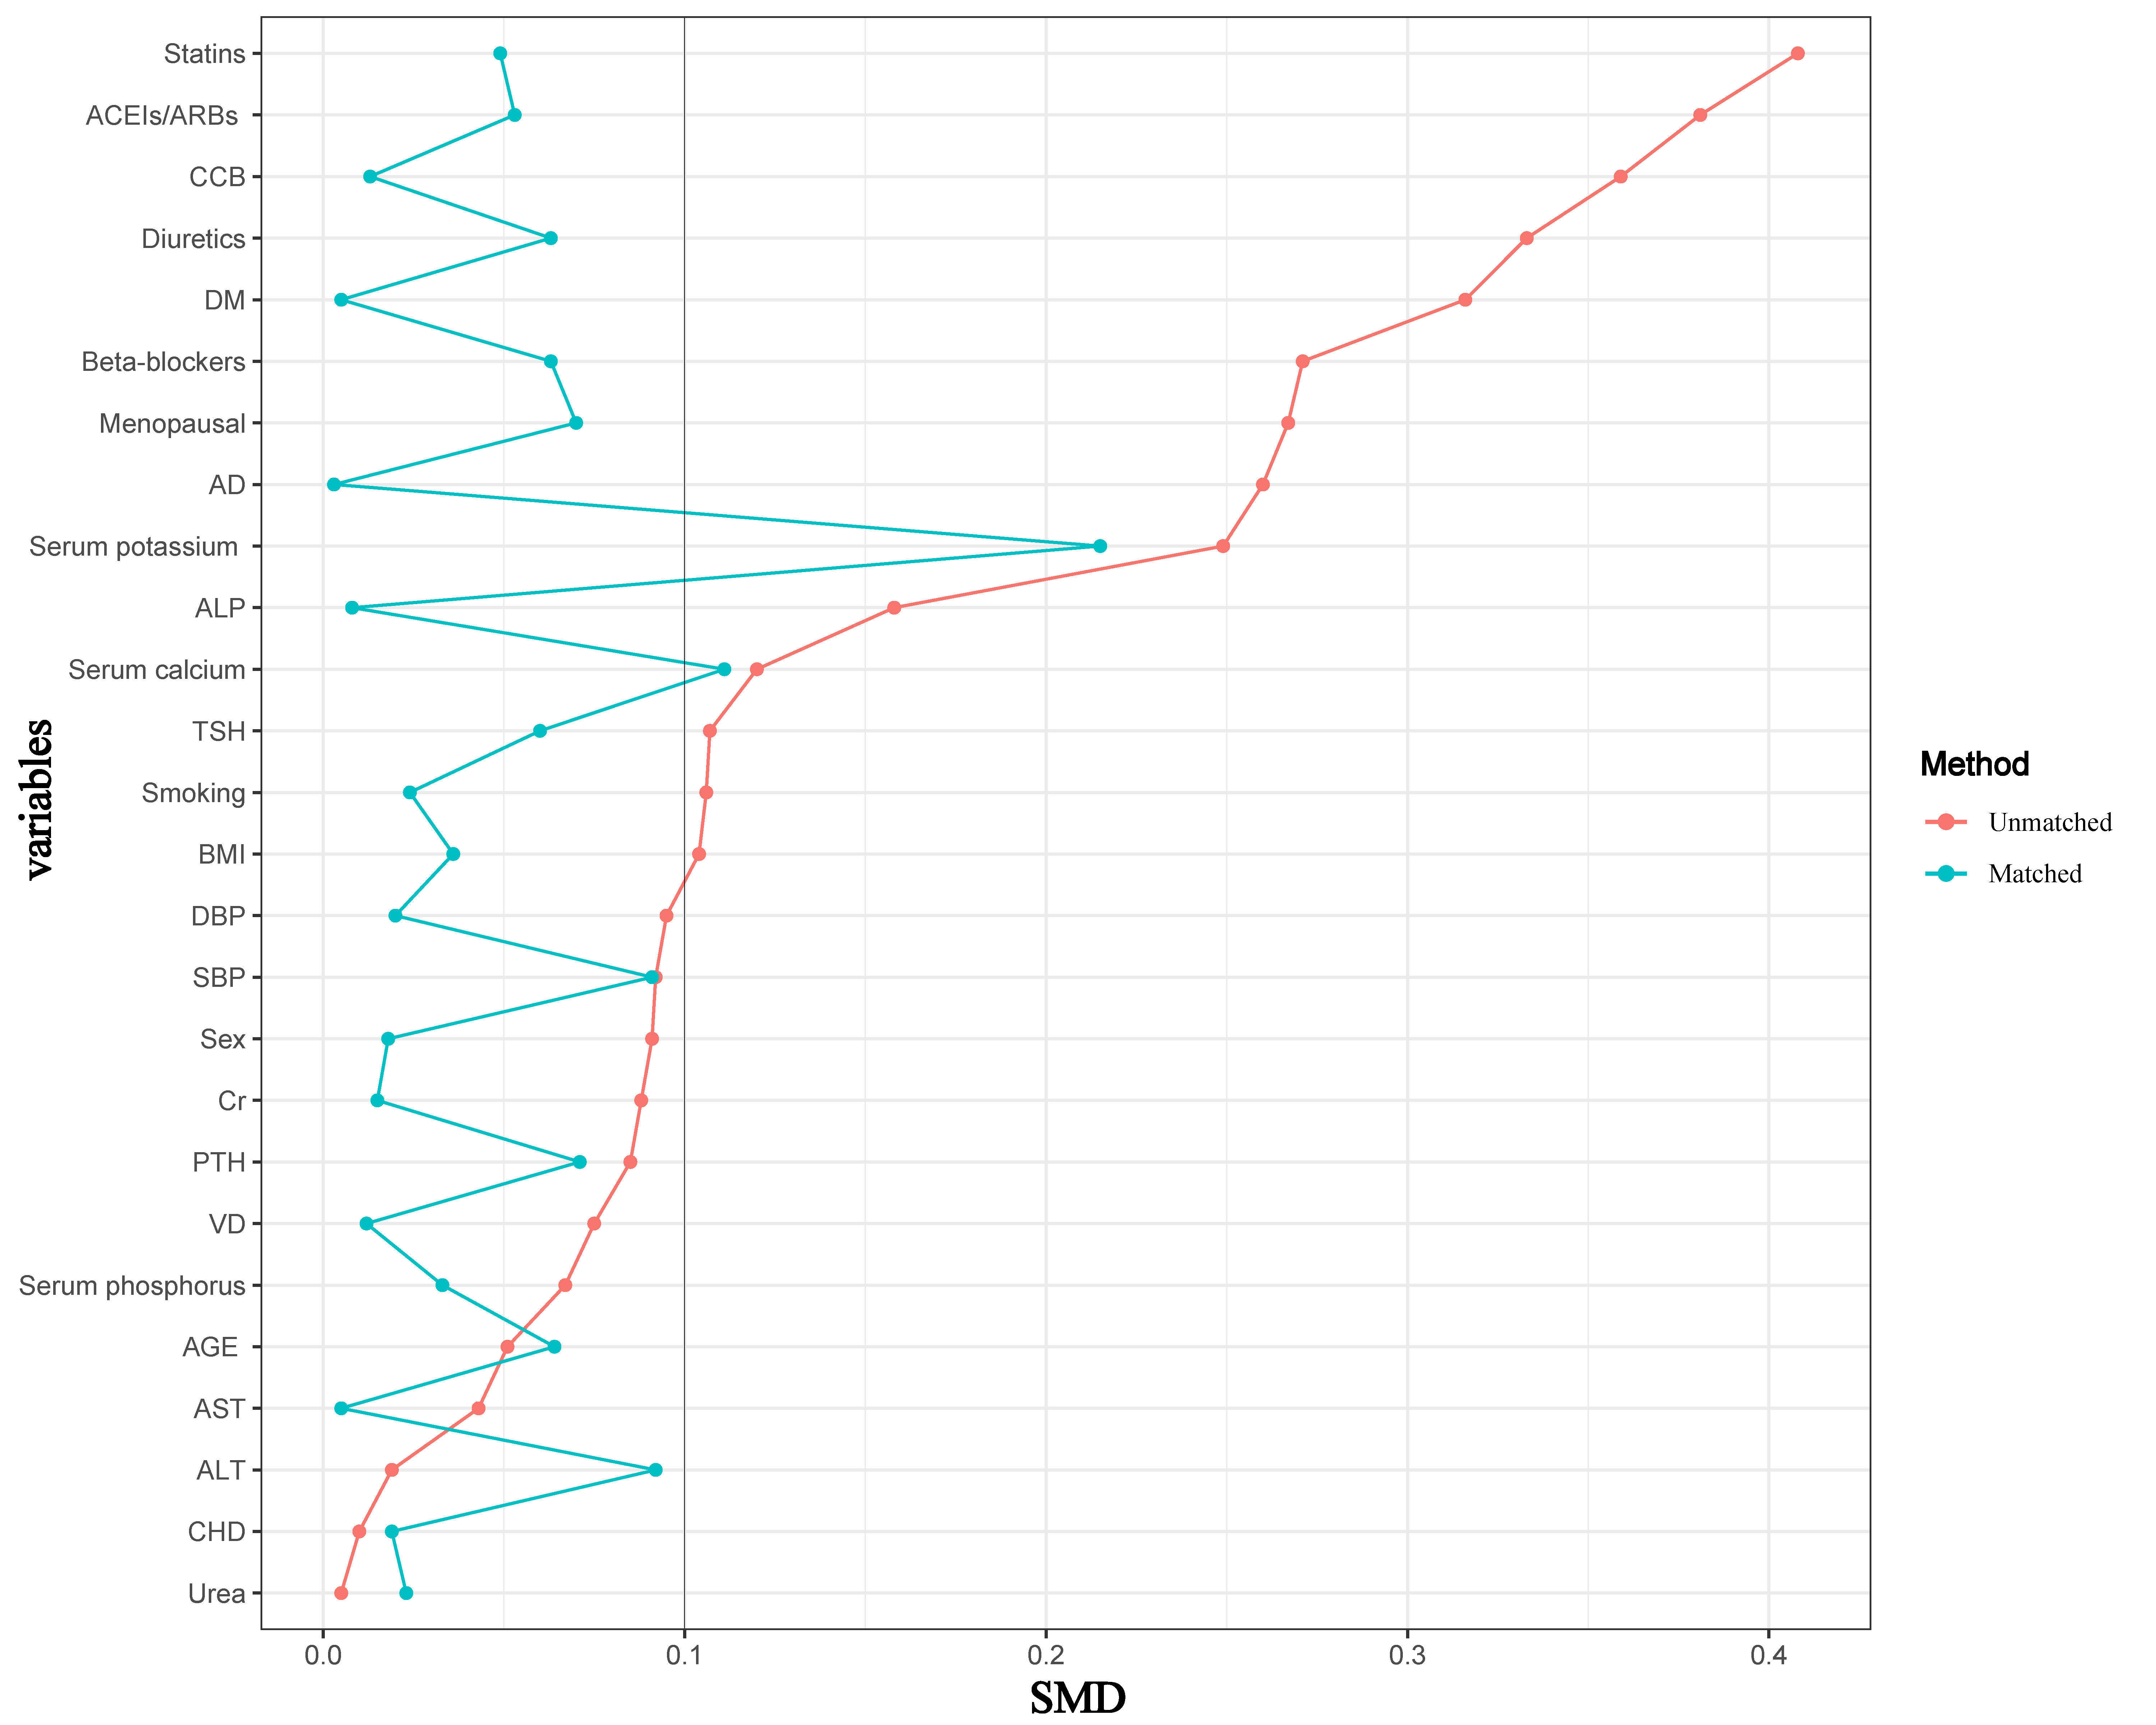


**Figure S3.** Relationship between cumulative drug dose and reduced bone mass


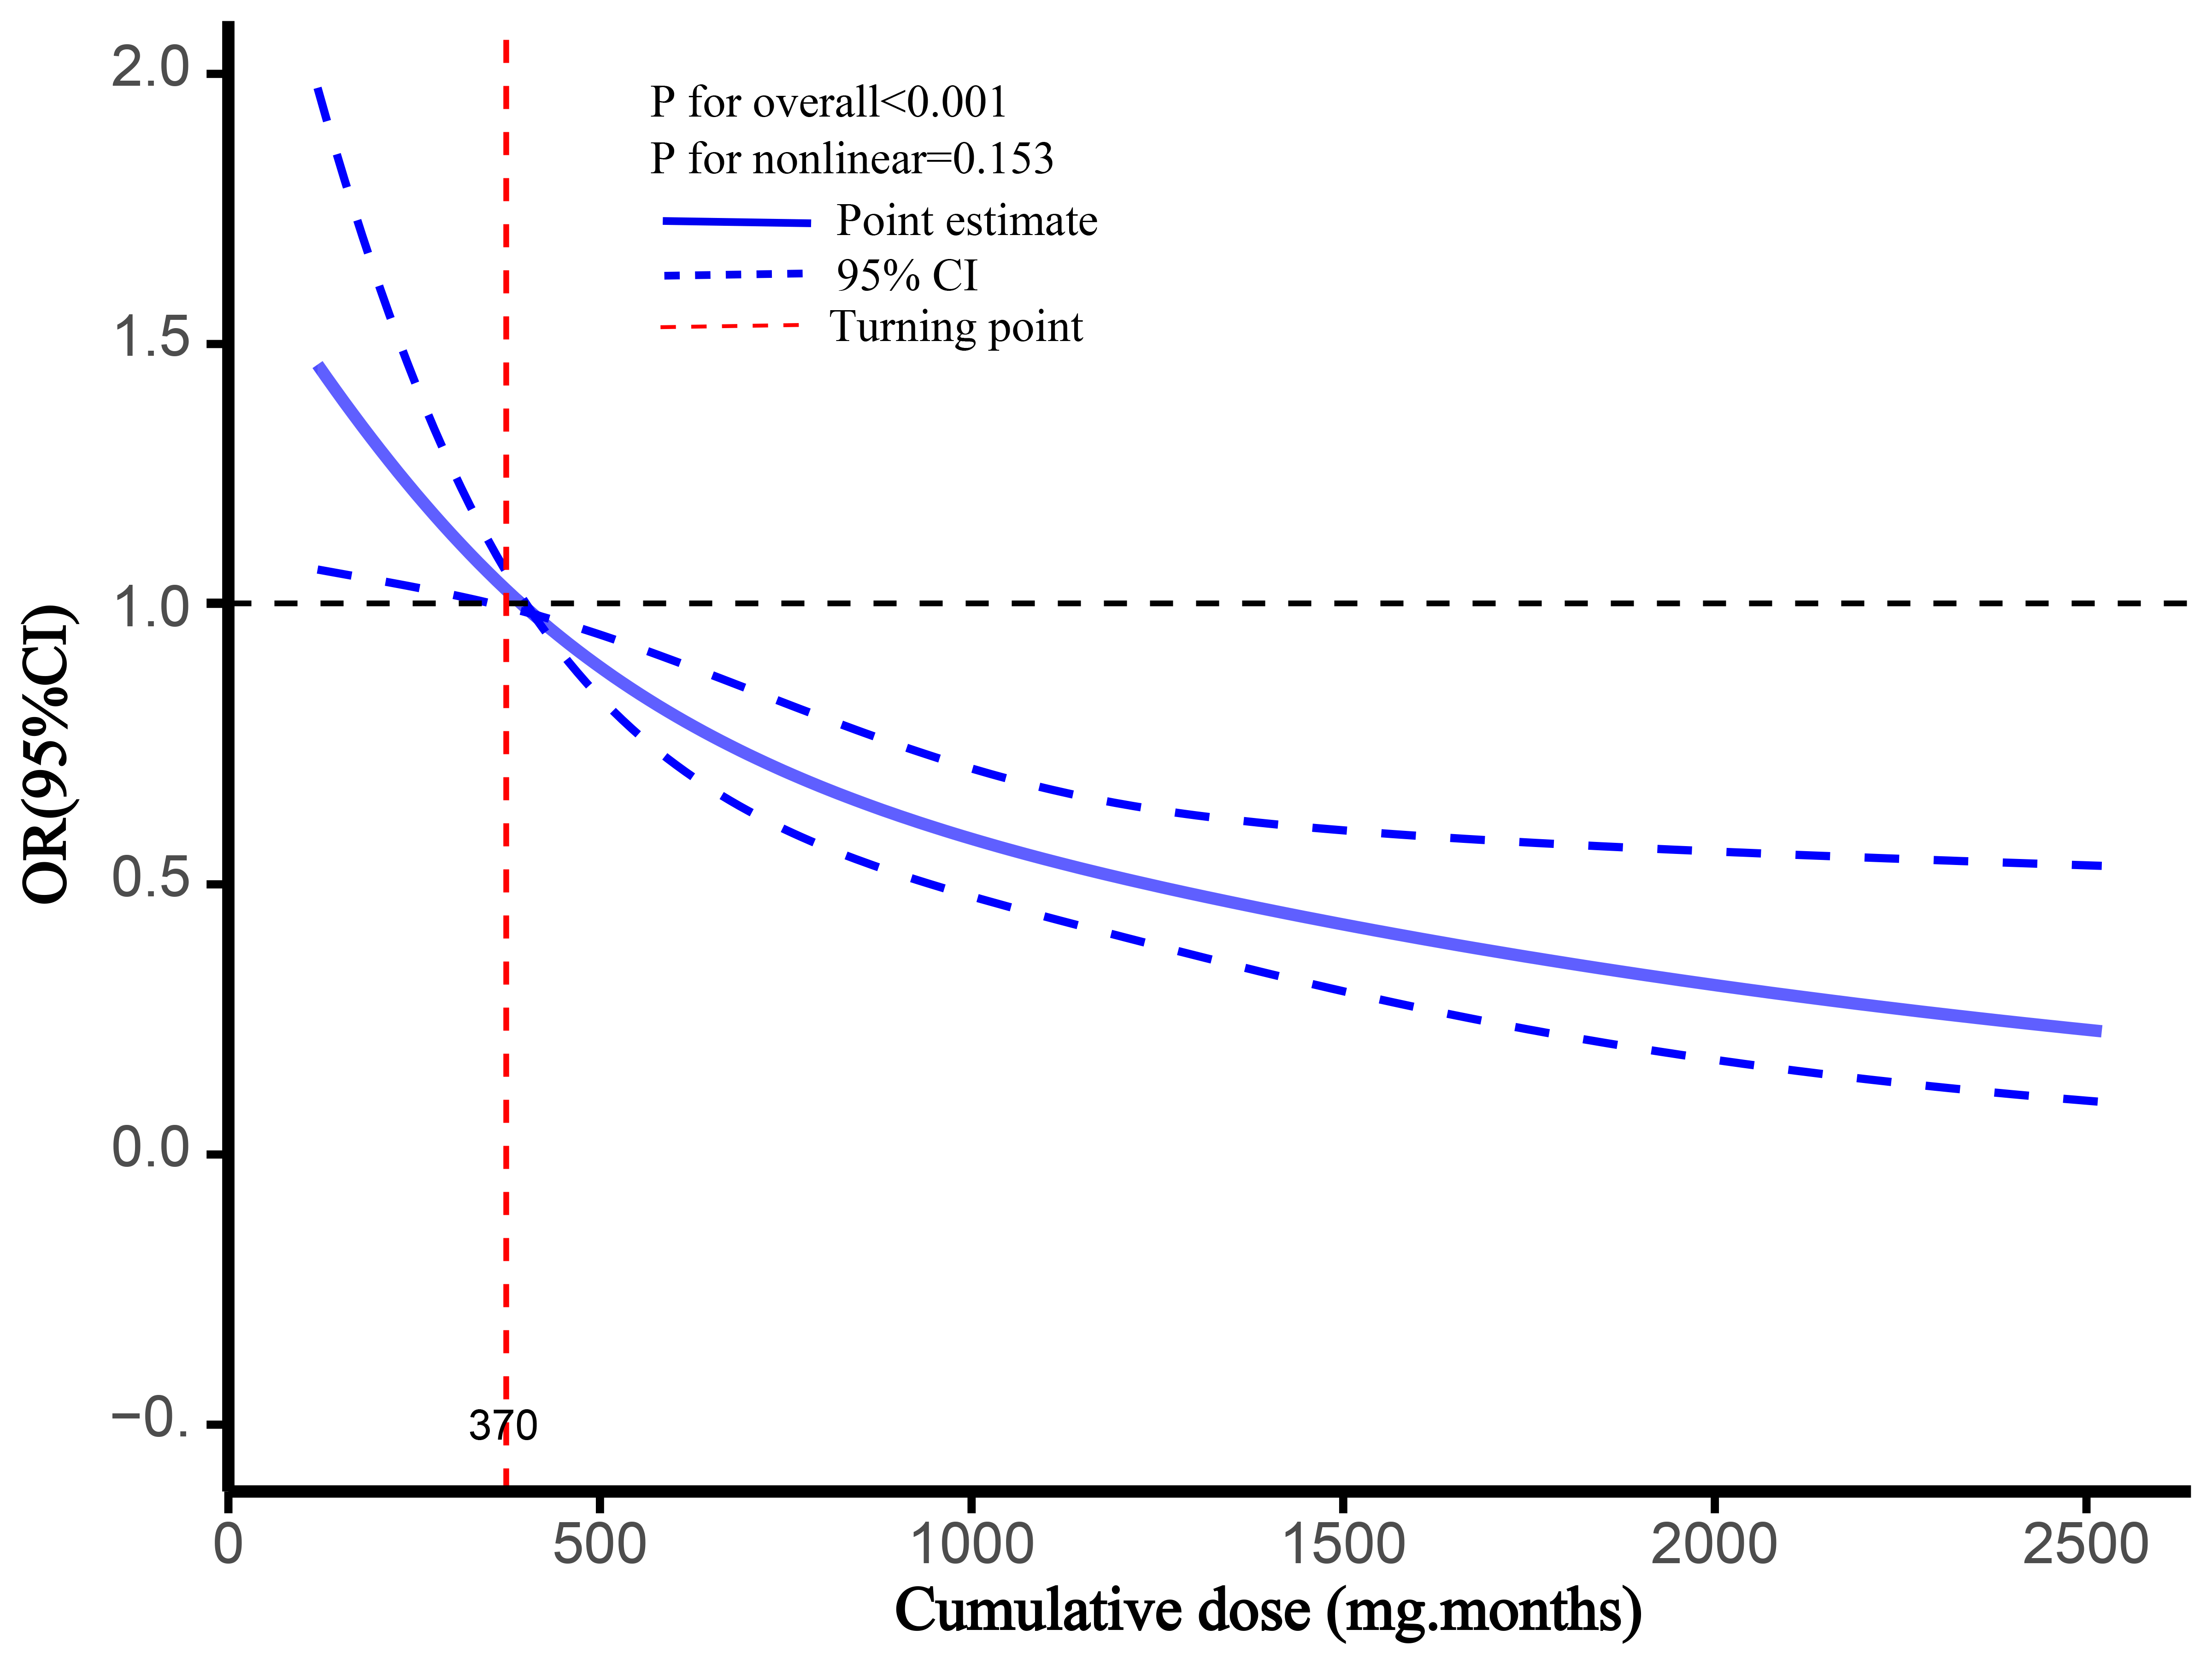


**Figure S4.** Association between cumulative drug dose and reduced bone mass in various subgroups

**
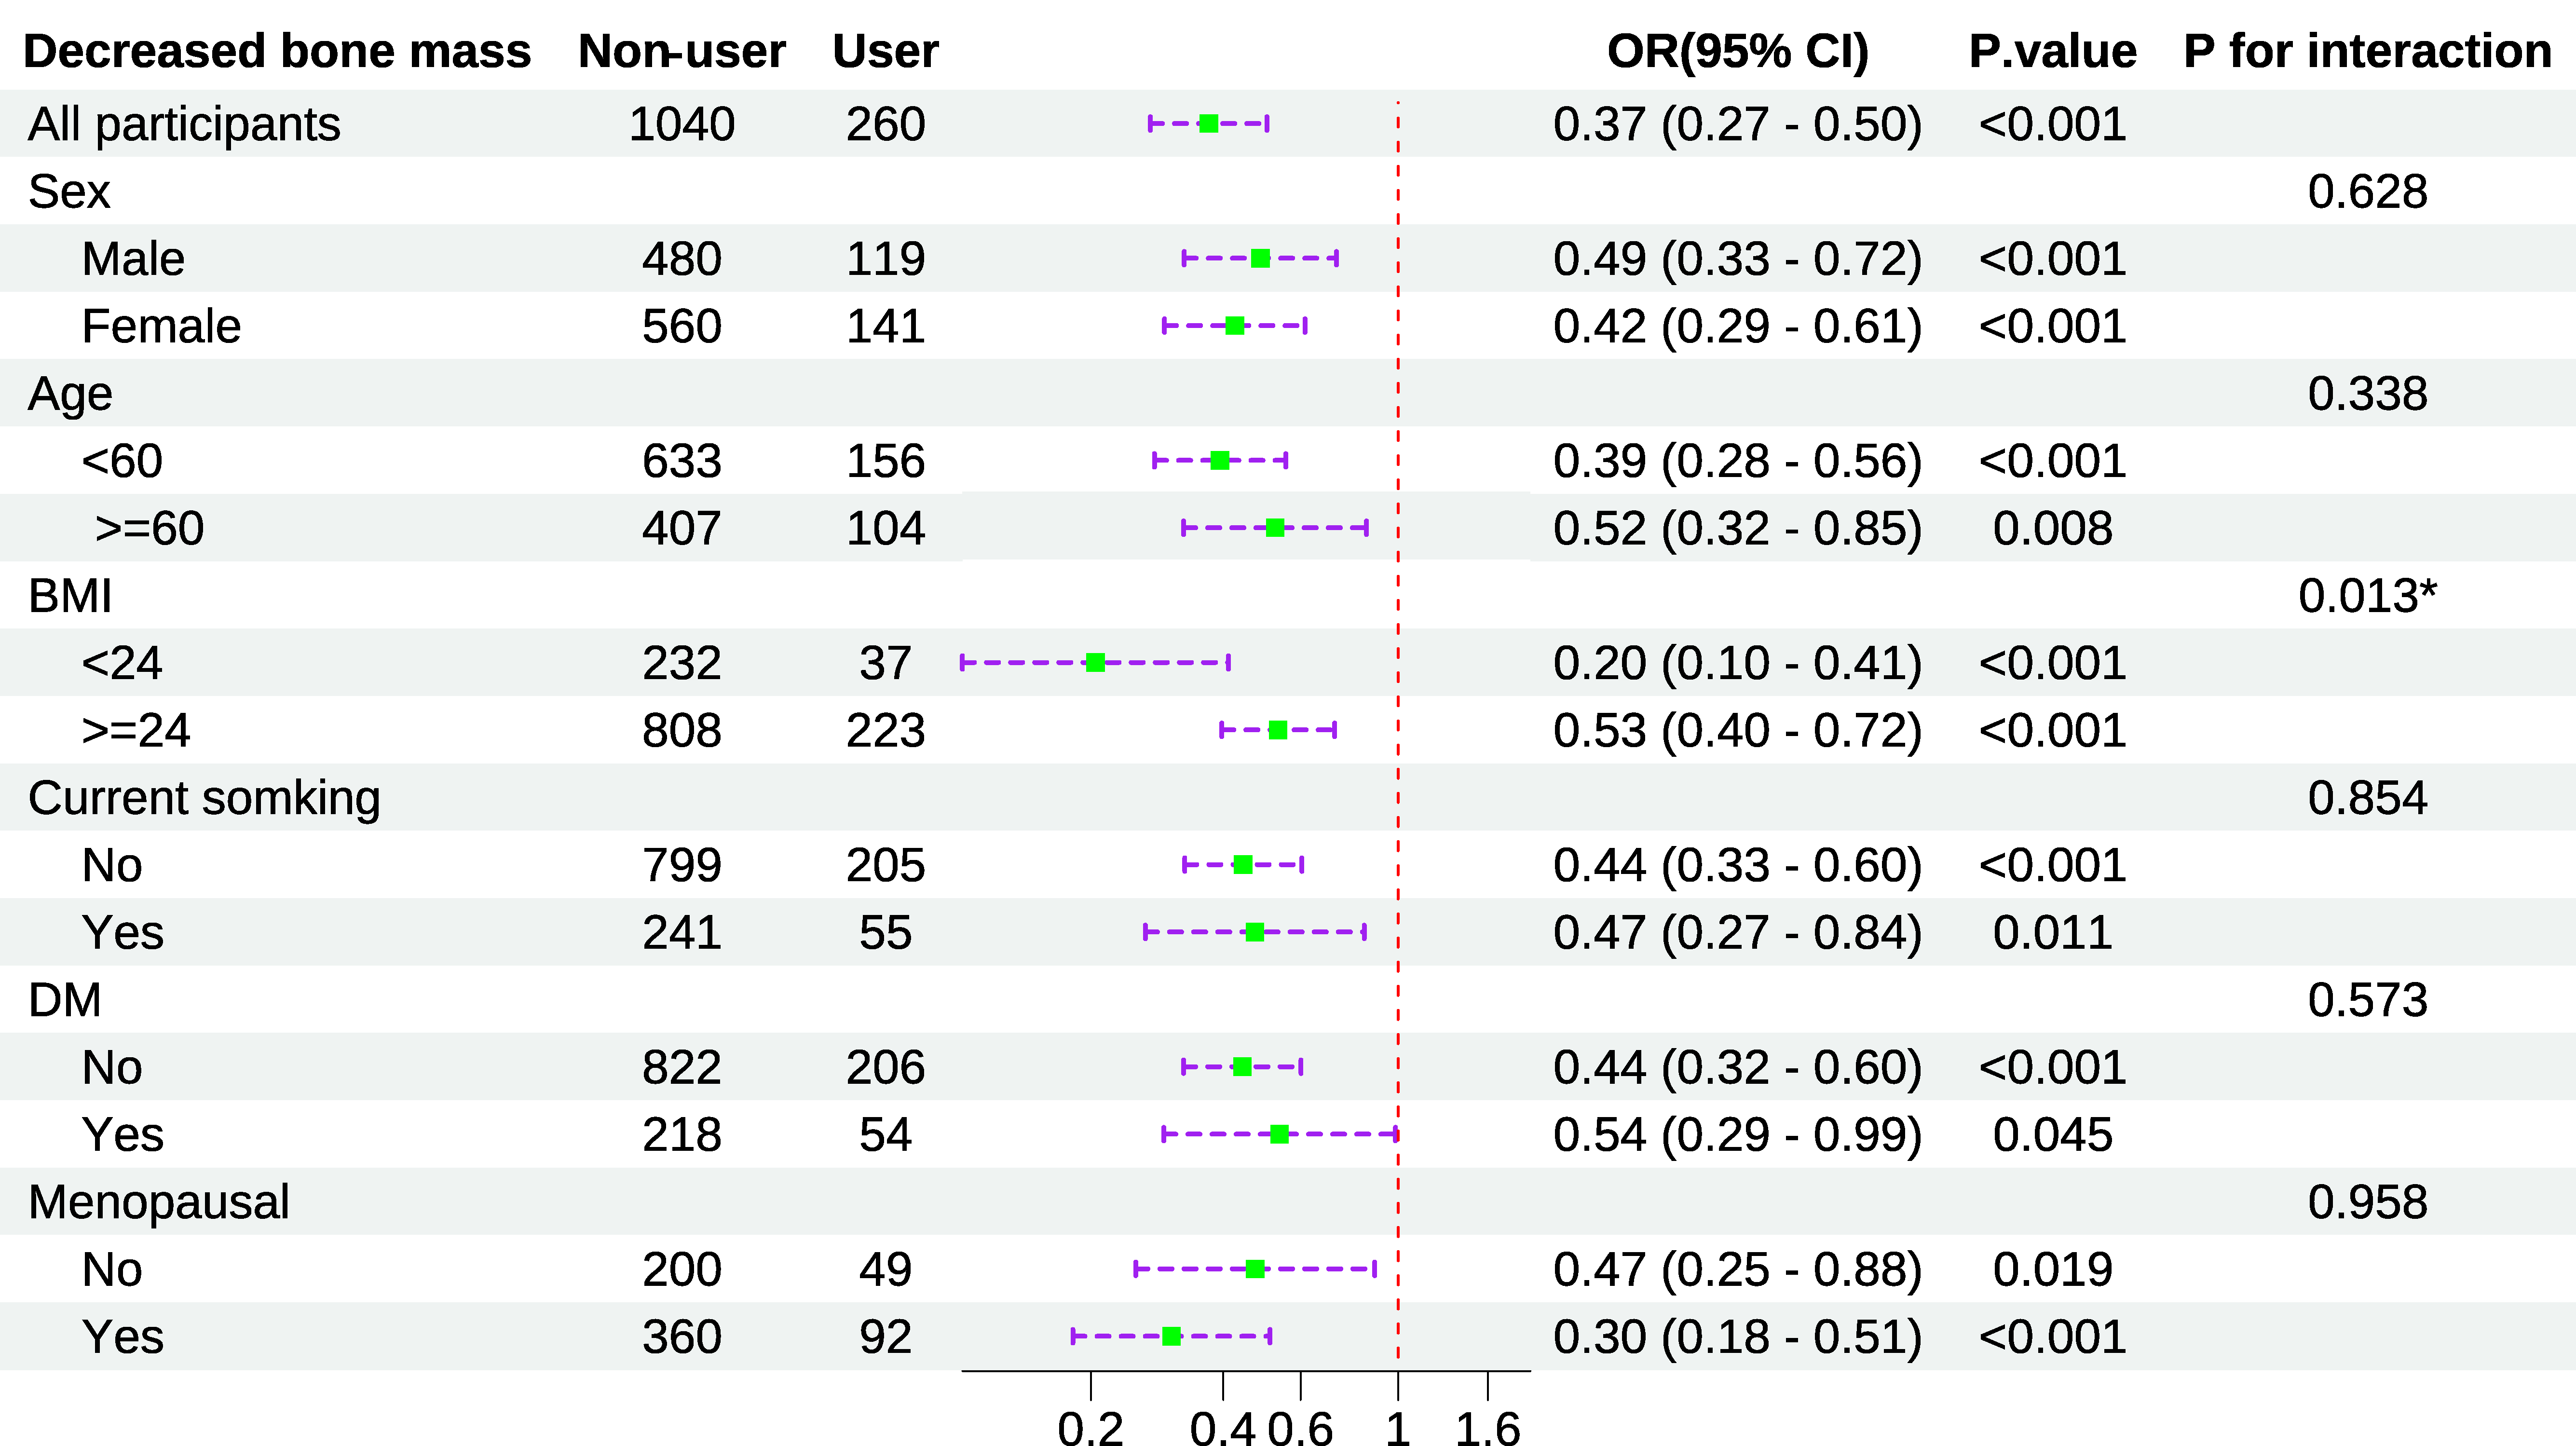
**

**Figure S5. Association between cumulative drug dose and reduced bone mass in medication subgroups.**

**
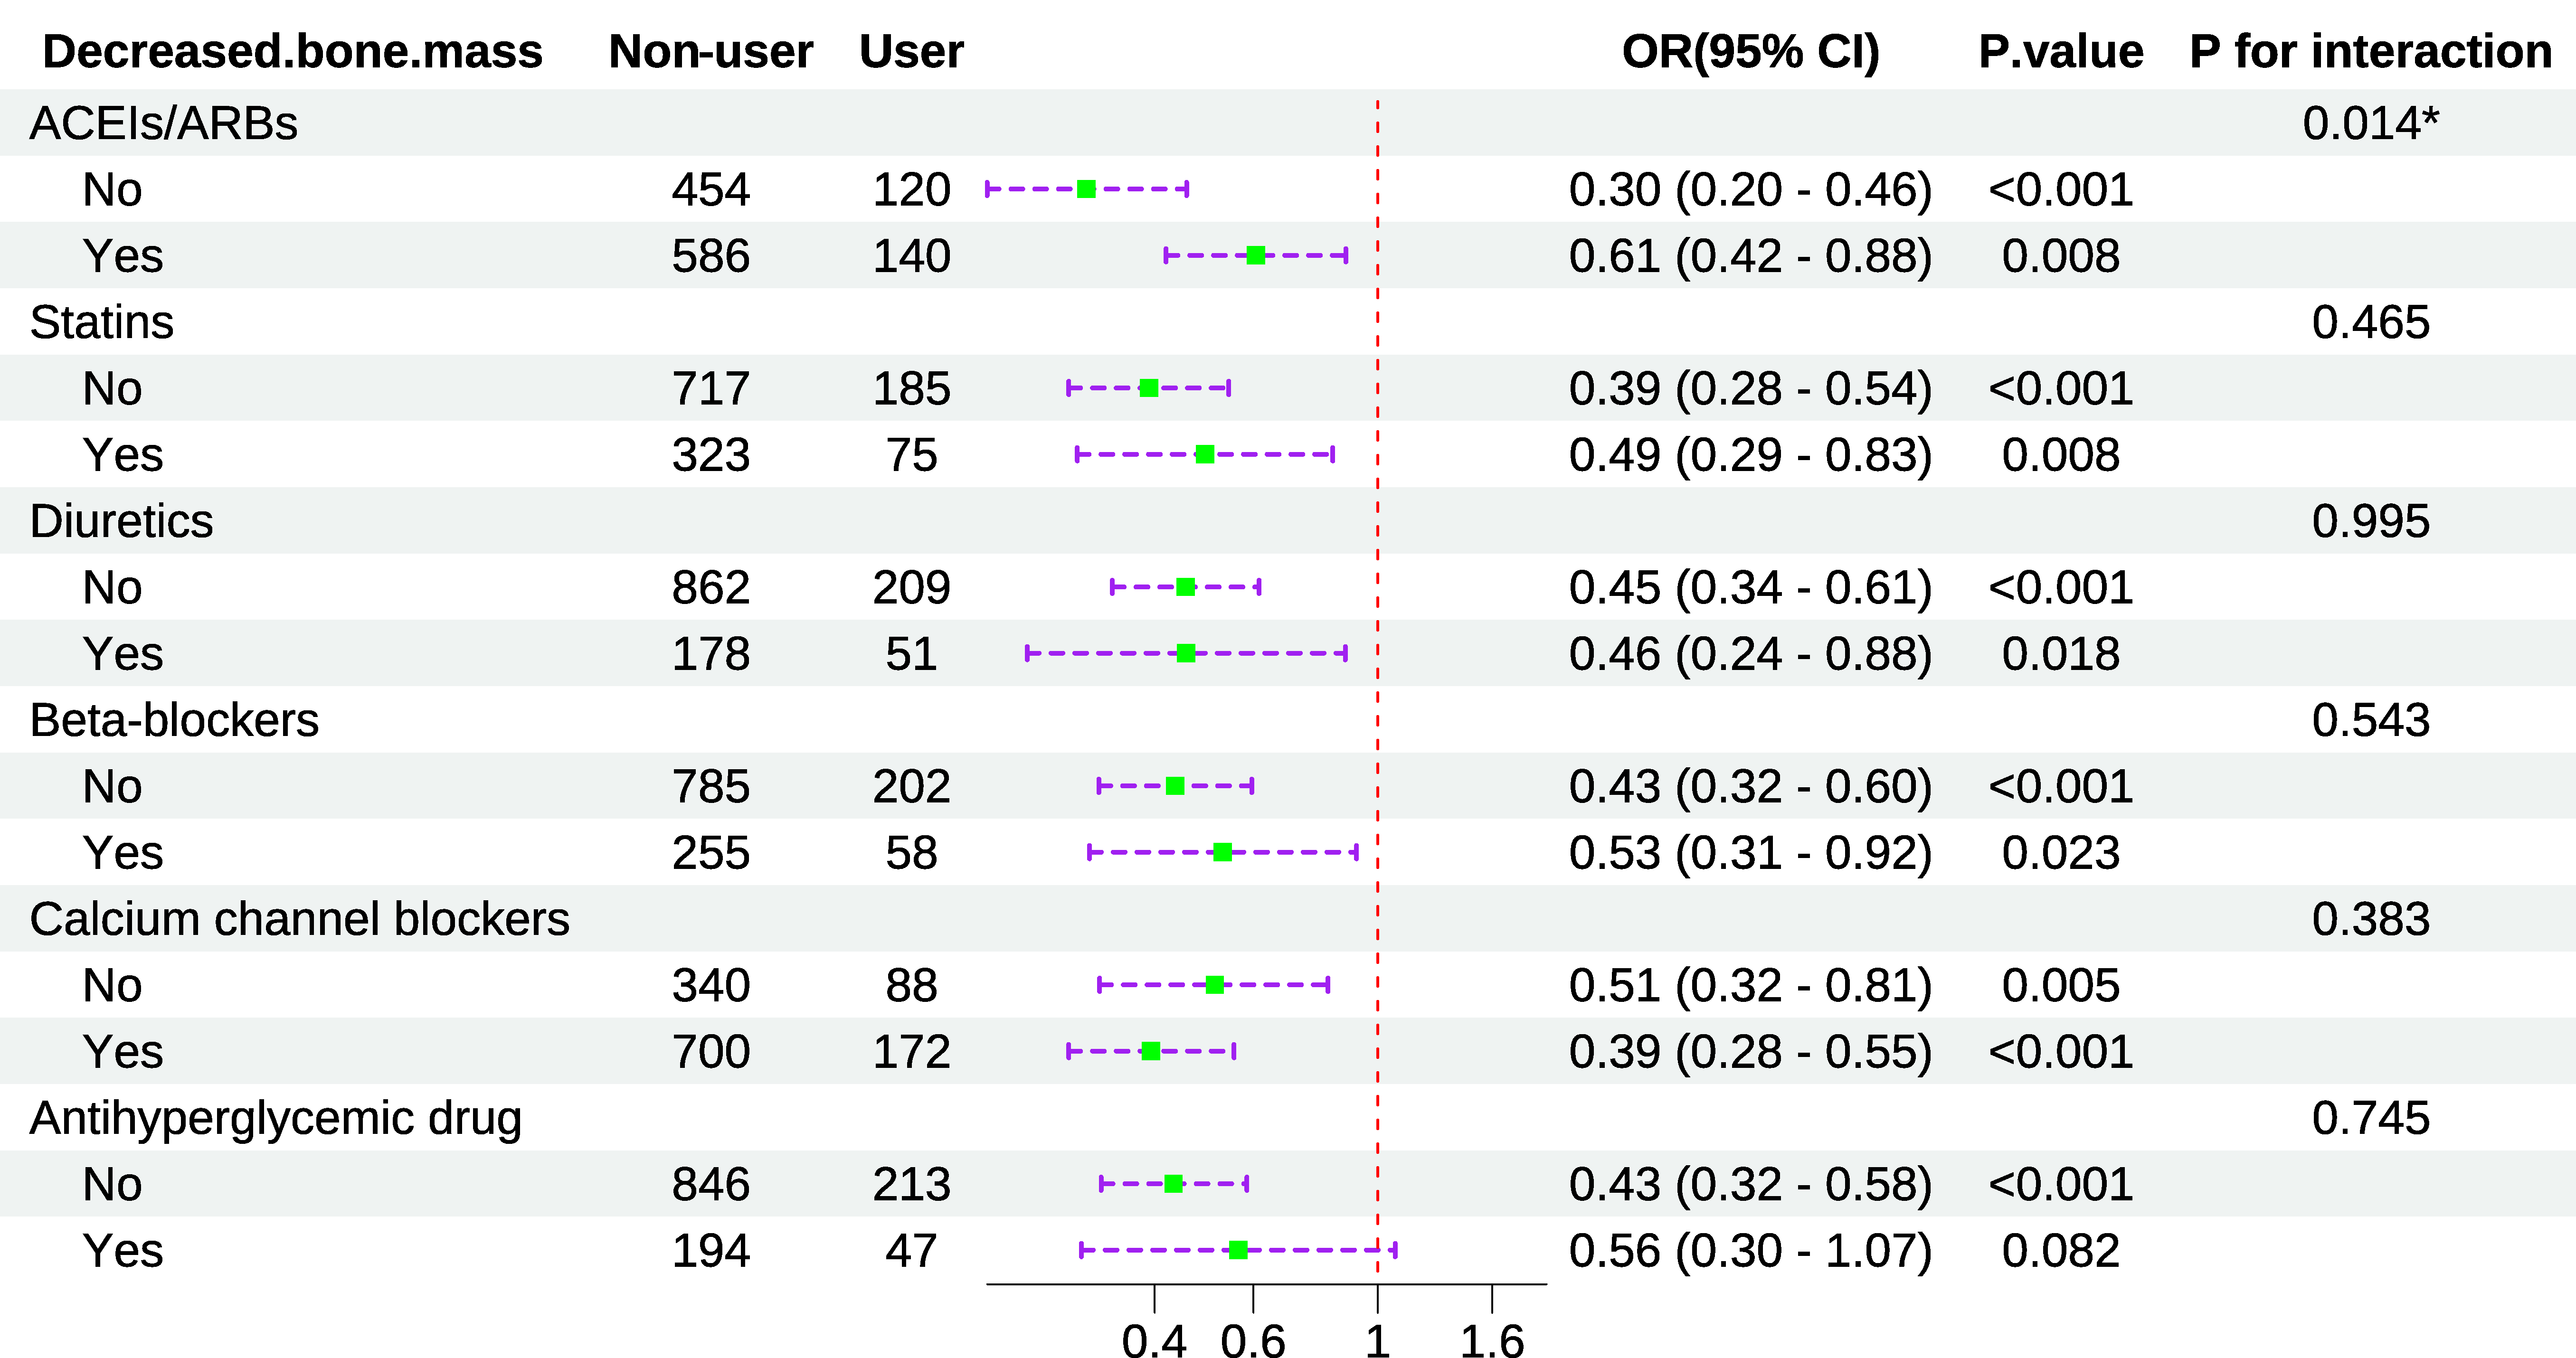
**

**References**

1. Funder JW, Carey RM, Mantero F, Murad MH, Reincke M, Shibata H, et al. The Management of Primary Aldosteronism: Case Detection, Diagnosis, and Treatment: An Endocrine Society Clinical Practice Guideline. The Journal of clinical endocrinology and metabolism. 2016;101(5):1889-916. Epub 2016/03/05. doi: 10.1210/jc.2015-4061. PubMed PMID: 26934393.

2. Clemons M, Simmons C. Identifying menopause in breast cancer patients: considerations and implications. Breast cancer research and treatment. 2007;104(2):115-20. Epub 2006/10/25. doi: 10.1007/s10549-006-9401-y. PubMed PMID: 17061039.

3. Wen Z, Li Y, Xu L, Yue C, Wang Q, Chen R, et al. Triglyceride Glucose-Body Mass Index Is a Reliable Indicator of Bone Mineral Density and Risk of Osteoporotic Fracture in Middle-Aged and Elderly Nondiabetic Chinese Individuals. Journal of clinical medicine. 2022;11(19). Epub 2022/10/15. doi: 10.3390/jcm11195694. PubMed PMID: 36233562; PubMed Central PMCID: PMCPMC9572437.

4. Chan CY, Subramaniam S, Chin KY, Ima-Nirwana S, Muhammad N, Fairus A, et al. Levels of Knowledge, Beliefs, and Practices Regarding Osteoporosis and the Associations with Bone Mineral Density among Populations More Than 40 Years Old in Malaysia. International journal of environmental research and public health. 2019;16(21). Epub 2019/11/17. doi: 10.3390/ijerph16214115. PubMed PMID: 31731507; PubMed Central PMCID: PMCPMC6861980.
